# Supplementary material for: Domestic Cats (Felis silvestris catus) Do Not Show Signs of Secure Attachment to Their Owners
Source: PLOS journal article supplement (doi:10.1371/journal.pone.0135109), 2015-09-02
Supplement: S1 (10.1371/journal.pone.0135109.s001) [file journal.pone.0135109.s001]

# Supporting Information

## S1 List of Behaviours

| Behaviour                                  | Description                                                                                                                                                                                                           |
|--------------------------------------------|-----------------------------------------------------------------------------------------------------------------------------------------------------------------------------------------------------------------------|
| Passive exploration:                       | Gathering of information from the environment from a stationary position, by visually scanning the area and/or by sniffing. The cat may do this from a standing, sitting or lying position [39].                      |
| Active exploration:                        | Gathering of information from the environment whilst moving around at a walk or trot, by sniffing, visual inspection and oral examination. Cat may stop intermittently to further investigate a particular area [30]. |
| Locomotion:                                | Walking, pacing or running around without exploring the environment or playing [13].                                                                                                                                  |
| Play involving another:                    | Any manipulating, patting, throwing, pouncing, chasing, wrestling of toys involving the active interaction with the owner or stranger.                                                                                |
| Independent play:                          | Manipulates an object with its paws in an apparently playful manner, without active engagement of another. Cat may also chase or paw at its own tail [40].                                                            |
| Approaching/orientation to person:         | Includes cat moving towards the owner or stranger, sitting, standing or lying down in the vicinity (0.3 m) of the owner or stranger.                                                                                  |
| Marking:                                   | Rubbing face or body against an object or person [7].                                                                                                                                                                 |
| Physical contact:                          | Any physical contact with the owner or stranger initiated by the cat excluding marking behaviour.                                                                                                                     |
| Following:                                 | Following the person around the room or to the door [12].                                                                                                                                                             |
| Approaching/contact with the door:         | Includes cat approximately the door, touching it, lying down or staying still in the vicinity of the door (0.3 m) [7].                                                                                                |
| Vigilance:                                 | In a state of alertness. Includes cat sitting, standing or lying down with eyes fully open, flicks ears occasionally as it scans its surroundings [40].                                                               |
| Passive behaviours:                        | Standing, sitting or lying down without any obvious orientation towards the physical or social environment [12].                                                                                                      |
| Vocalisation:                              | Includes meow, chirrup, trill, growl, yowl, hiss, purr, spit [40].                                                                                                                                                    |
| Contact with owners/strangers empty chair: | Cat sits, stands, lies down on or stands up on hind legs with forelegs on owners/strangers empty chair.                                                                                                               |
| Self-grooming:                             | Cat grooms itself by licking its body or by licking its paw and passing over its head. Grooming can include scratching and brief chewing of the body [40].                                                            |
| Hiding:                                    | Cat is located in hiding space provided in either testing room (Figure 1)                                                                                                                                             |
