# Supplementary material for: Domestic Cats (Felis silvestris catus) Do Not Show Signs of Secure Attachment to Their Owners
Source: PLOS journal article supplement (doi:10.1371/journal.pone.0135109), 2015-09-02
Supplement: S2 (10.1371/journal.pone.0135109.s002) [file journal.pone.0135109.s002]

# Supporting Information

## S2 Cross-over design

| Behaviour                        | Episodes                                                                                                                                                                 |
|----------------------------------|--------------------------------------------------------------------------------------------------------------------------------------------------------------------------|
| <i>Proximity/contact seeking</i> |                                                                                                                                                                          |
| Following and approach           | A2 and A8 and<br>B6 and B4(S)<br>B2 and B8 and<br>A6 and A4(O)<br>A2 and B6 (S)<br>B2 and A6 (O)<br>A4 and B8 (O)<br>B4 and A8 (S)<br>A1 and B5 (O+S)<br>B5 and A1 (O+S) |
| Physical contact                 | A2 and A8 and<br>B6 and B4(S)<br>B2 and B8 and<br>A6 and A4(O)<br>A2 and B6 (S)<br>B2 and A6 (O)<br>A4 and B8 (O)<br>B4 and A8 (S)<br>A1 and B5 (O+S)<br>B5 and A1 (O+S) |
| Marking                          | A2 and A8 and<br>B6 and B4(S)<br>B2 and B8 and<br>A6 and A4(O)<br>A2 and B6 (S)<br>B2 and A6 (O)<br>A4 and B8 (O)<br>B4 and A8 (S)<br>A1 and B5 (O+S)<br>B5 and A1 (O+S) |
| <i>Secure-base effect</i>        |                                                                                                                                                                          |
| Exploration/locomotion           | A2 and B6 (S)<br>B2 and A6 (O)<br>A4 and B8 (O)<br>B4 and A8 (S)<br>A2 and A8 and<br>B6 and B4(S)<br>B2 and 8B and<br>A6 and A4(O)                                       |
| Passive                          | A2 and B6 (S)<br>B2 and A6 (O)                                                                                                                                           |

|                                |               |
|--------------------------------|---------------|
| Social play                    | A4 and B8 (O) |
|                                | B4 and A8 (S) |
|                                | A2 and A8 and |
|                                | B6 and B4(S)  |
|                                | B2 and B8 and |
|                                | A6 and A4(O)  |
|                                | A2 and A8 and |
|                                | B6 and B4(S)  |
|                                | B2 and B8 and |
|                                | A6 and A4(O)  |
|                                | A2 and B6 (S) |
|                                | B2 and A6 (O) |
|                                | A4 and B8 (O) |
|                                | B4 and A8 (S) |
|                                | A1 and B5 (S) |
|                                | B1 and A5 (O) |
| <i>Distress when separated</i> |               |
| Vocalising                     | A2 and A8 and |
|                                | B6 and B4(S)  |
|                                | B2 and B8 and |
|                                | A6 and A4(O)  |
|                                | A2 and B6 (S) |
|                                | B2 and A6 (O) |
|                                | A4 and B8 (O) |
|                                | B4 and A8 (S) |
|                                | A2 and A8 and |
|                                | B6 and B4(S)  |
| Approaching door               | B2 and B8 and |
|                                | A6 and A4(O)  |
|                                | A2 and B6 (S) |
|                                | B2 and A6 (O) |
|                                | A4 and B8 (O) |
|                                | B4 and A8 (S) |
|                                | A3 and B7 (C) |
|                                | A7 and B3 (C) |
|                                | A2 and A8 and |
|                                | B6 and B4(S)  |
| Vigilance                      | B2 and B8 and |
|                                | A6 and A4(O)  |
|                                | A2 and B6 (S) |
|                                | B2 and A6 (O) |
|                                | A4 and B8 (O) |
|                                | B4 and A8 (S) |
|                                | A3 and B7 (C) |
|                                | A7 and B3 (C) |
|                                | A2 and B6 (S) |
|                                | B2 and A6 (O) |
| Contact chair O/S              | A4 and B8 (O) |
|                                | B4 and A8 (S) |
|                                | A3 and B7 (C) |
|                                | A7 and B3 (C) |
|                                | A2 and B6 (S) |
|                                | B2 and A6 (O) |
|                                | A4 and B8 (O) |
